# Supplementary material
Source: HighWire-hosted journal article supplement (http://www.cmaj.ca/highwire/filestream/70432/field_highwire_adjunct_files/6/170914-res-7-at.pdf)

## Appendix 7: Calibration for sub-groups in validation data, males.

There were 118 subgroups examined. Of those subgroups, there were 110 of 111 groups that had a less than 20% difference in observed versus predicted risk at a 95% confidence interval.

\* 0 metabolic equivalents of task [METs] for leisure time physical activity: 0.0464 observed versus 0.0382 predicted 5-year cardiovascular disease risk ( $p < 0.05$ ).

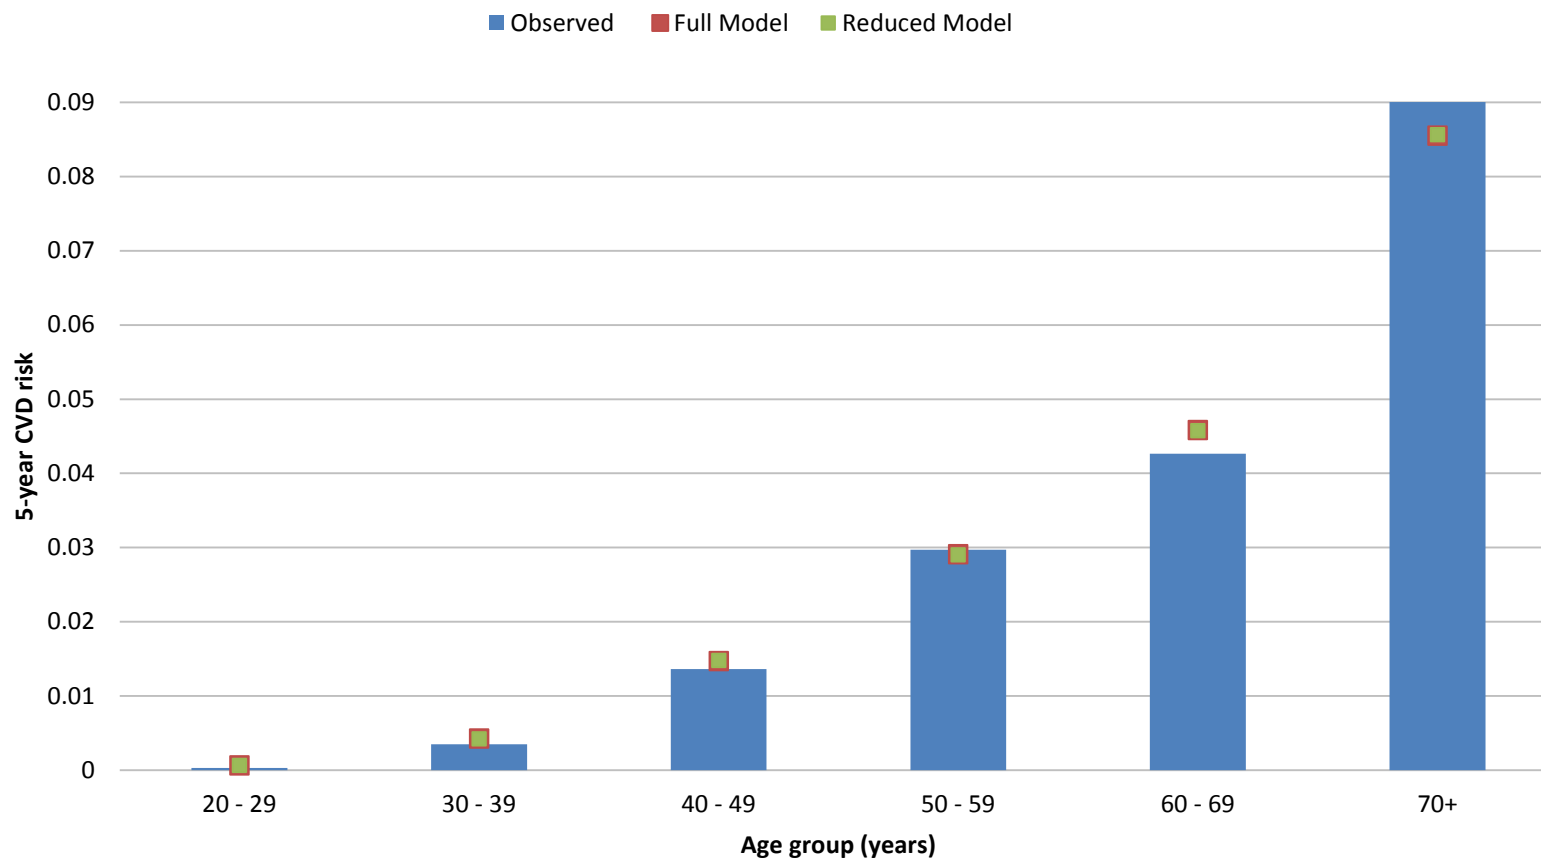

Appendix to: Manuel DG, Tuna M, Bennett C, et al. Development and validation of a cardiovascular disease risk-prediction model using population health surveys: the Cardiovascular Disease Population Risk Tool (CVDPoRT). *CMAJ* 2018. doi: 10.1503/cmaj.170914. Copyright © 2018 The Author(s) or their employer(s). To receive this resource in an accessible format, please contact us at [cmajgroup@cmaj](mailto:cmajgroup@cmaj).

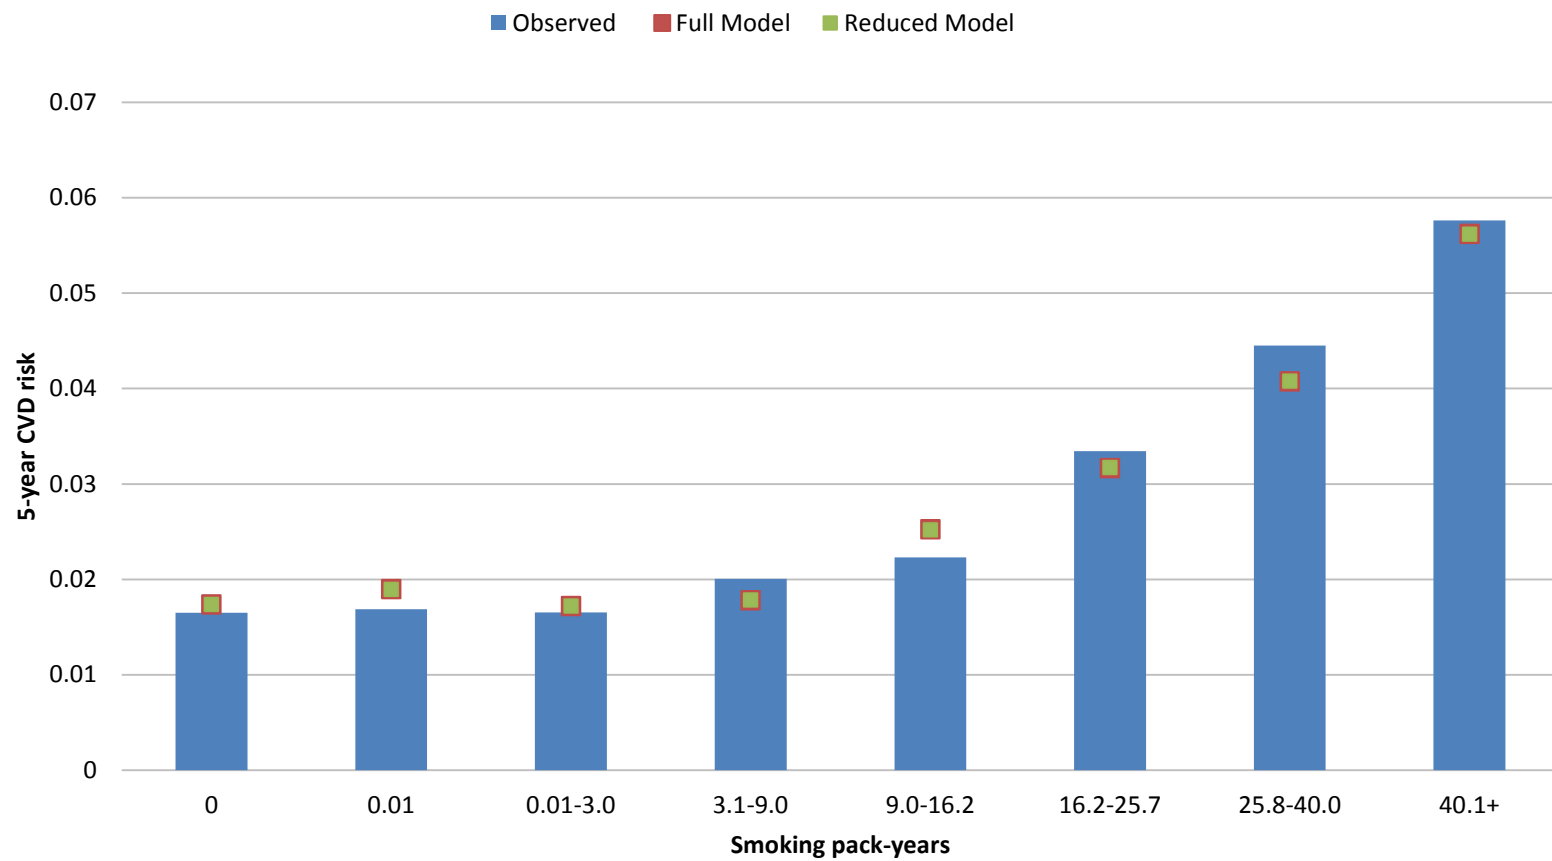

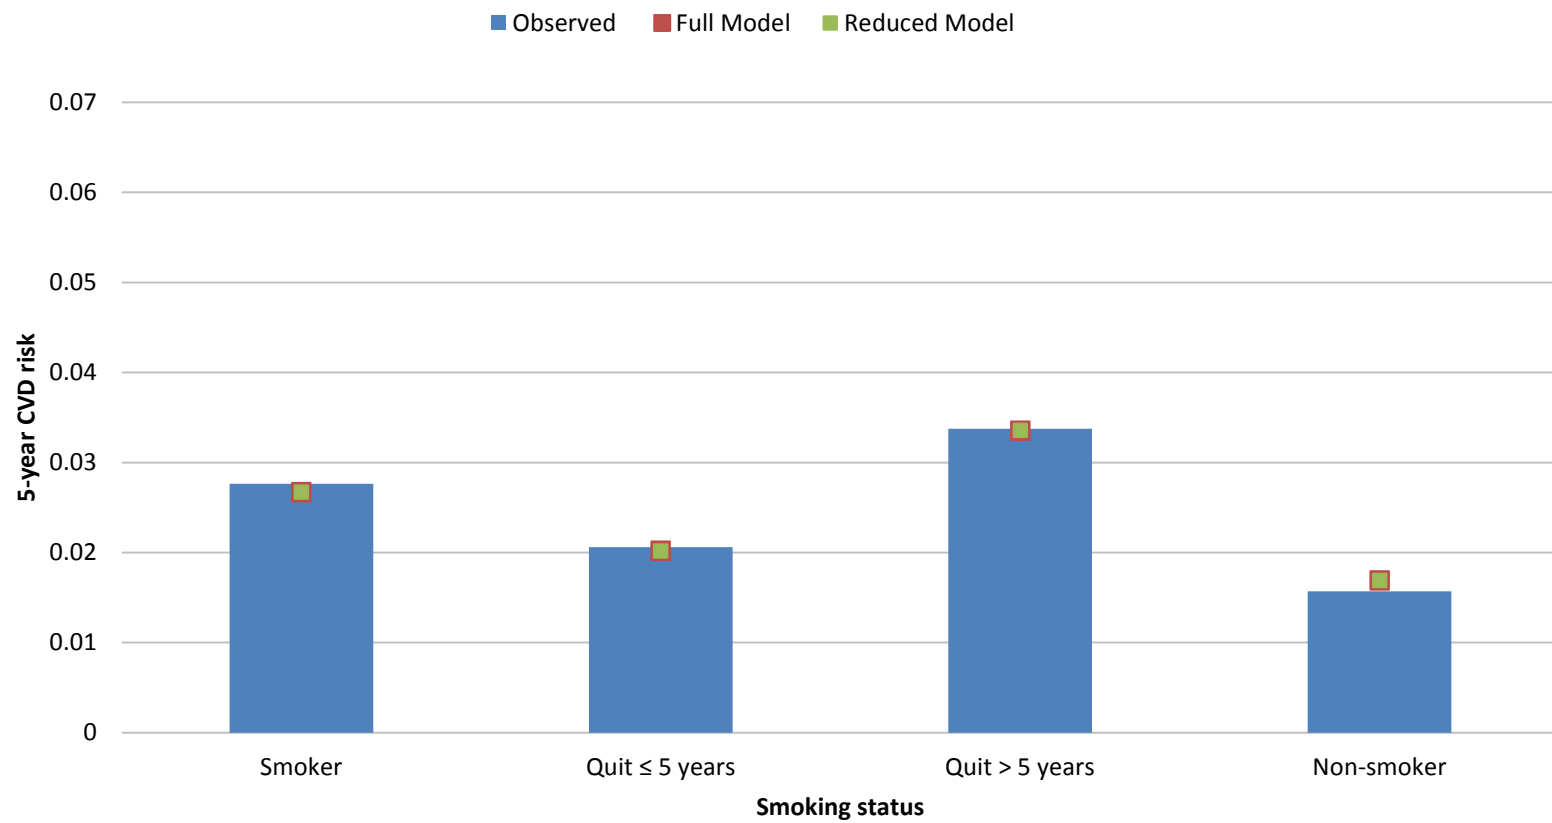

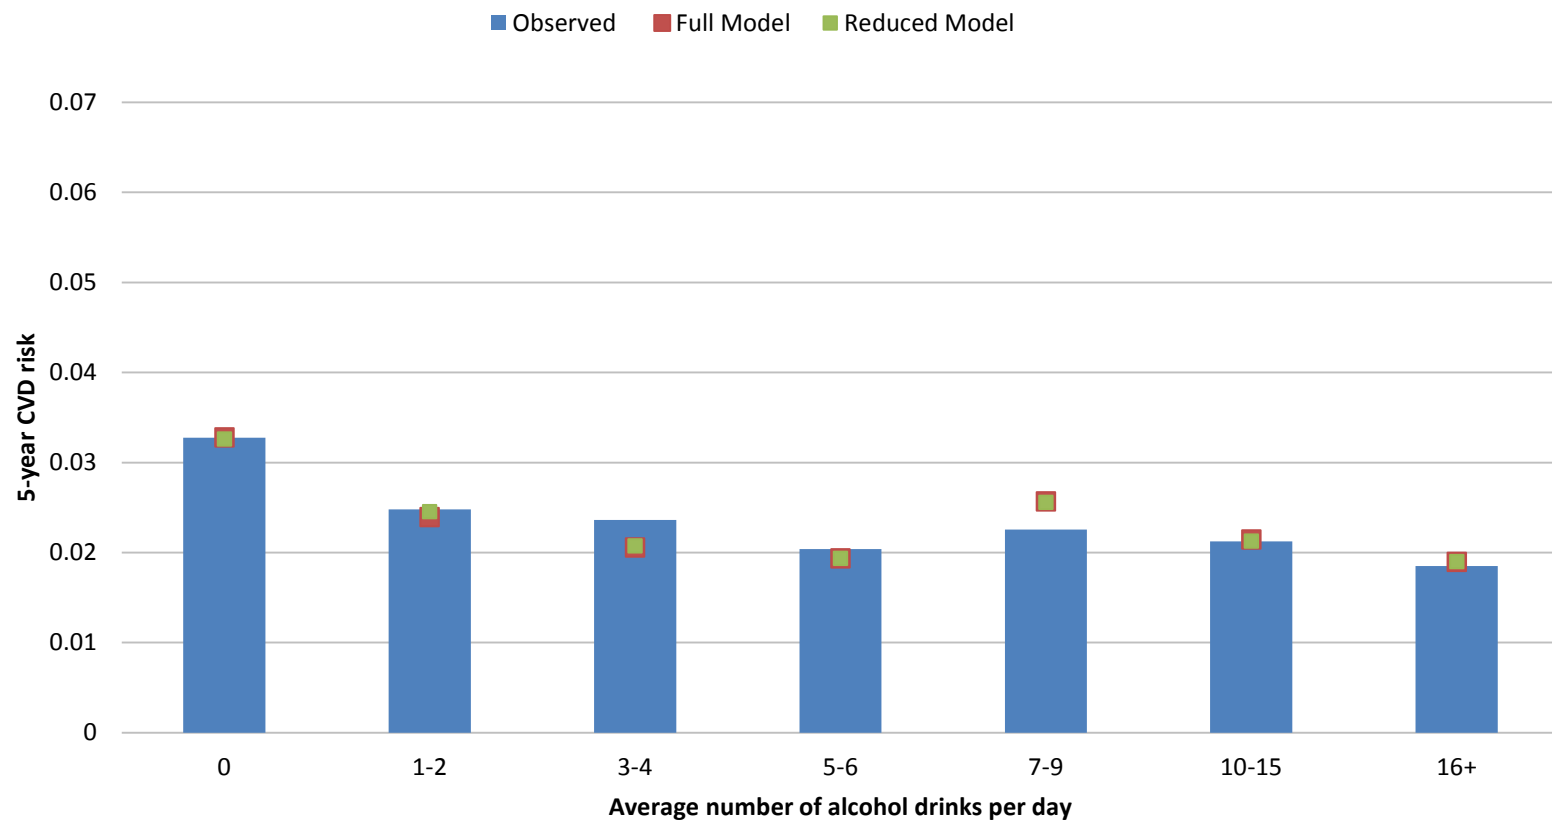

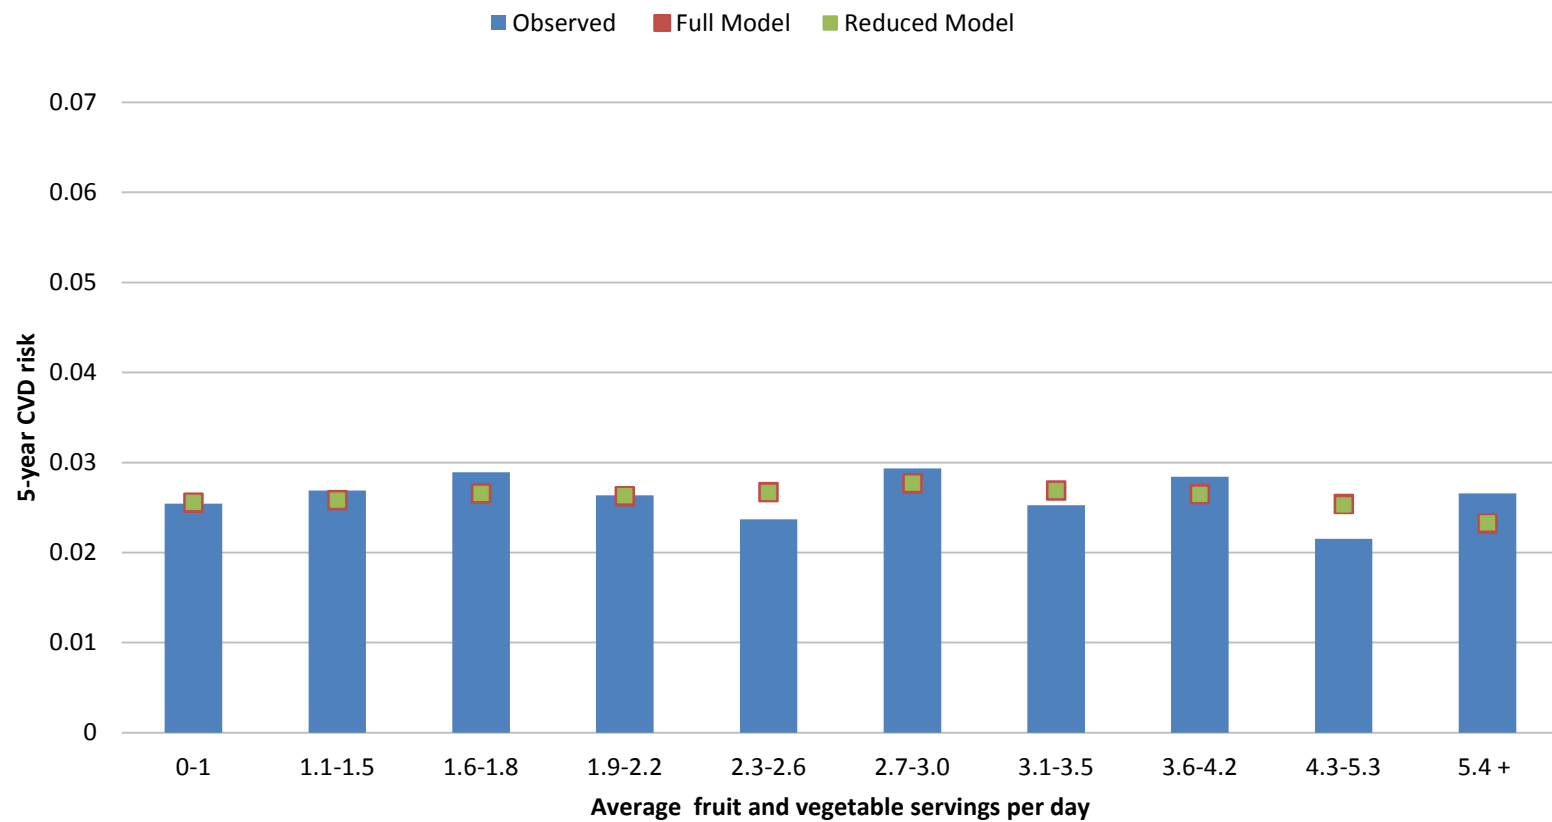

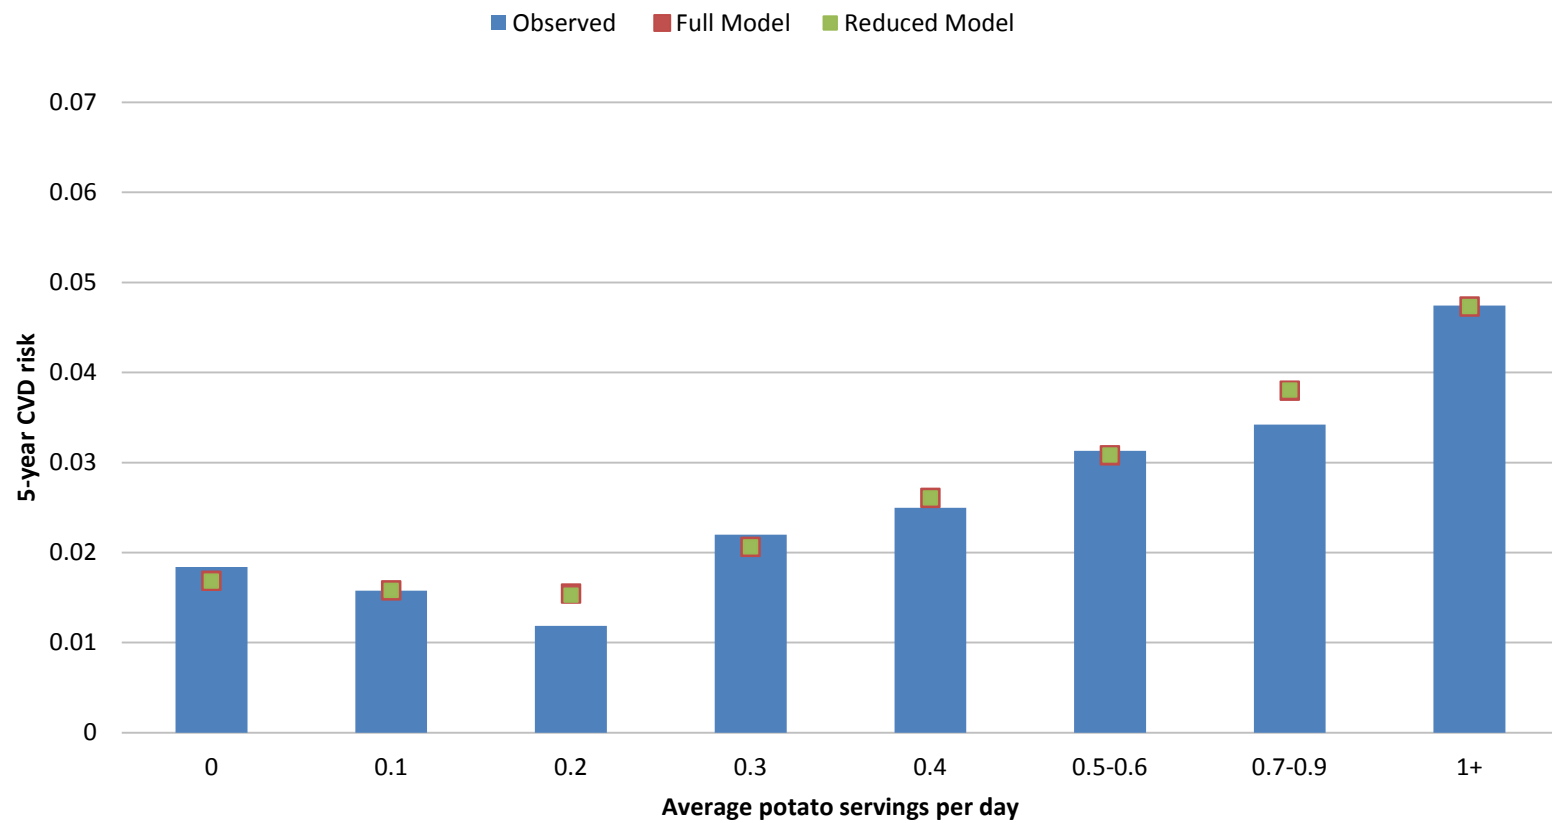

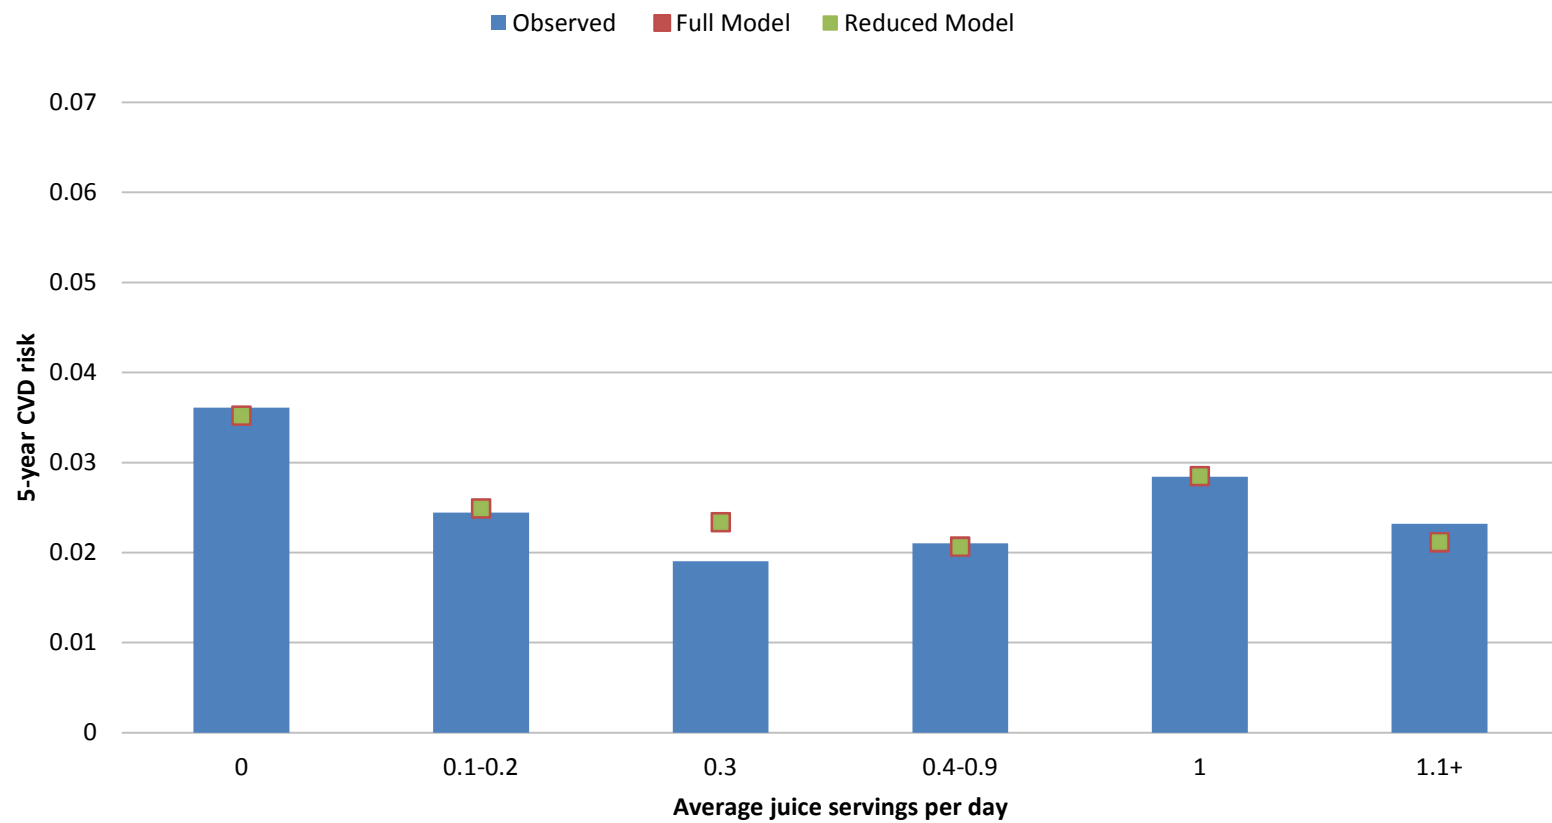

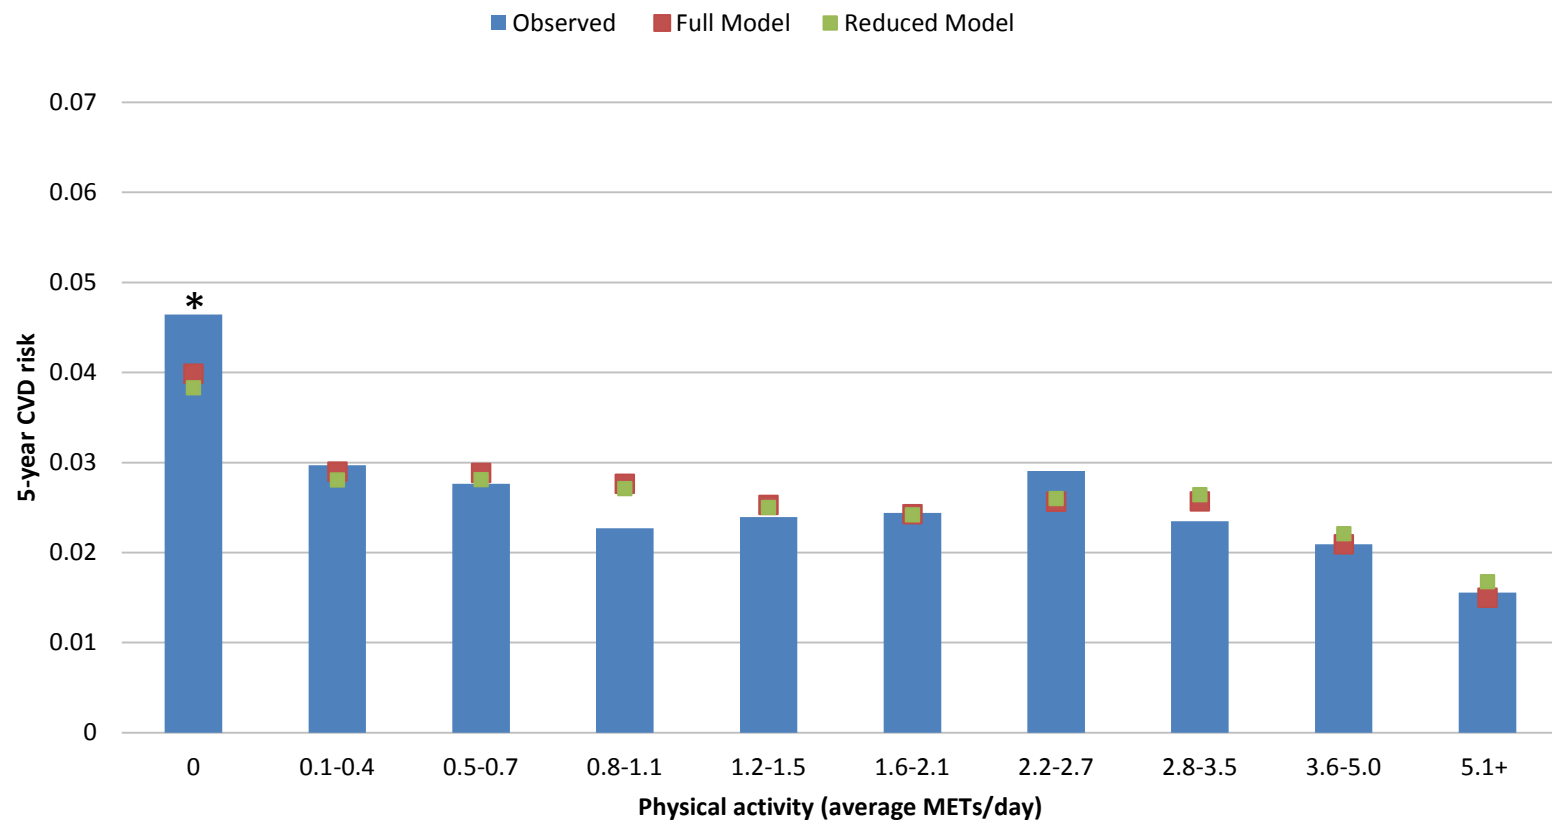



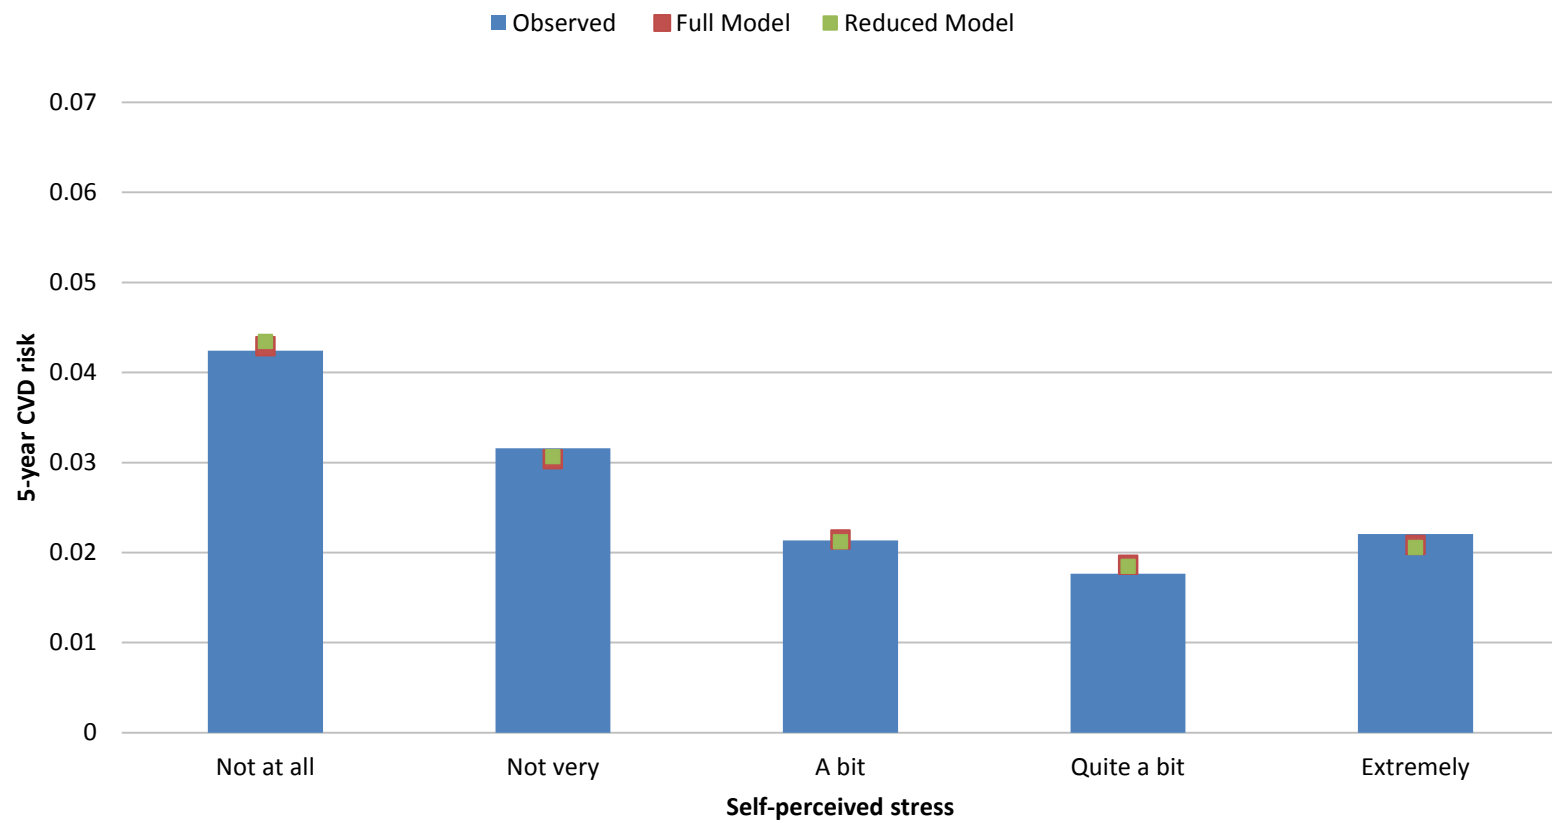

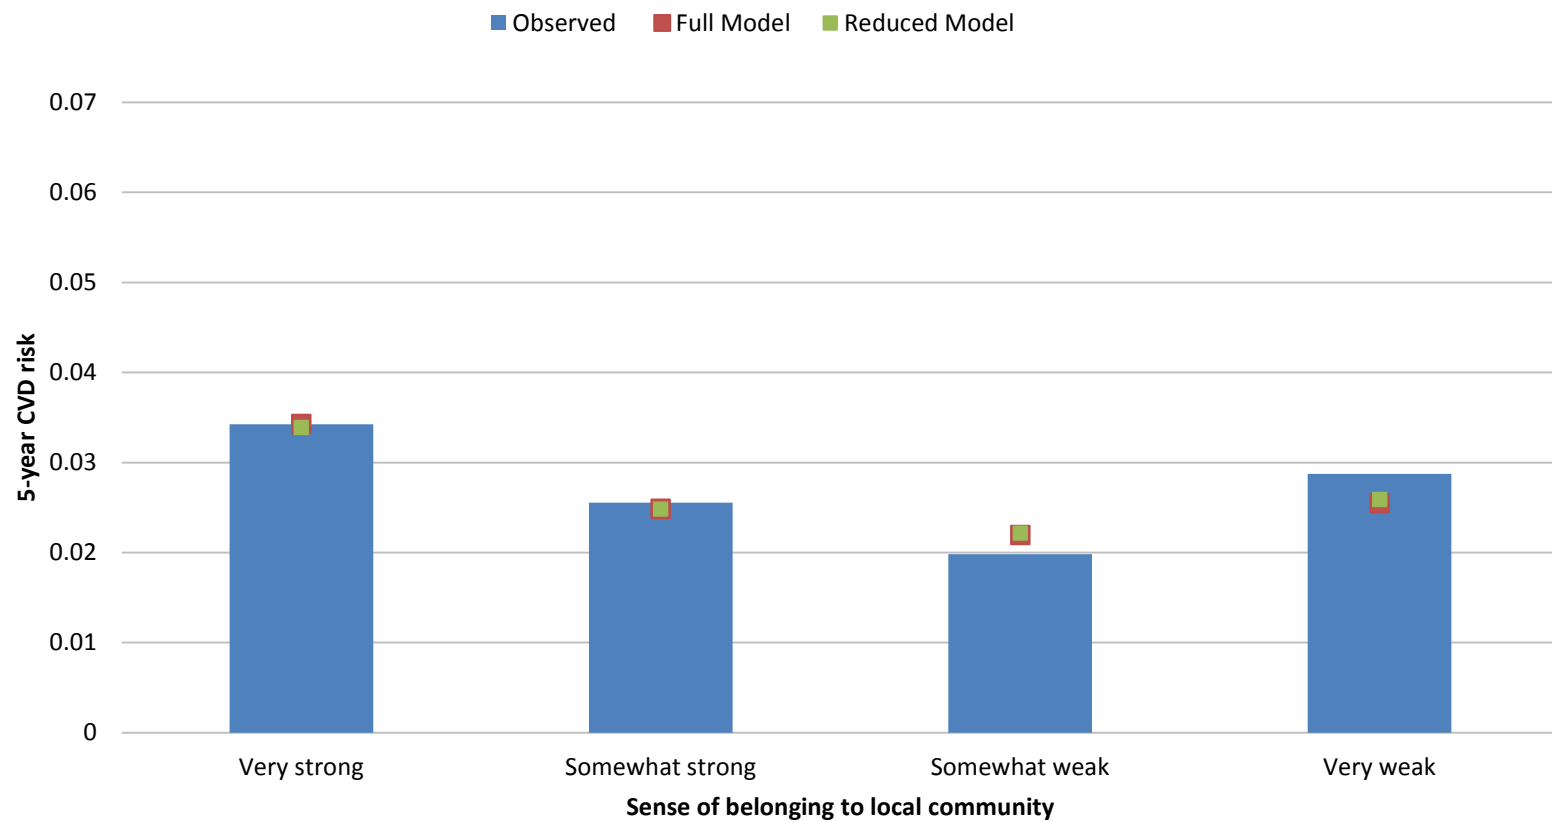

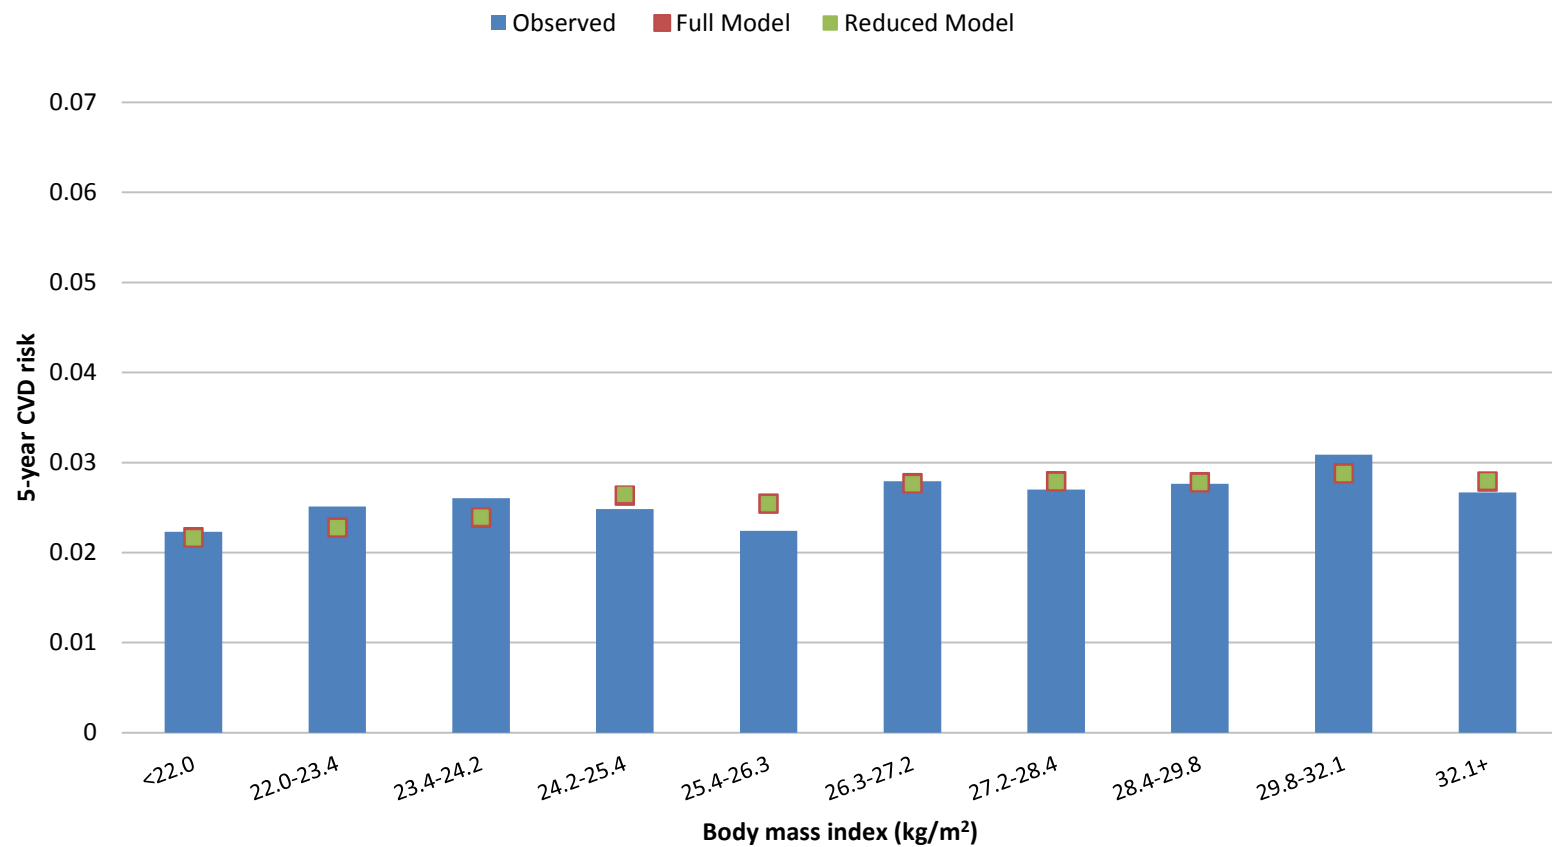

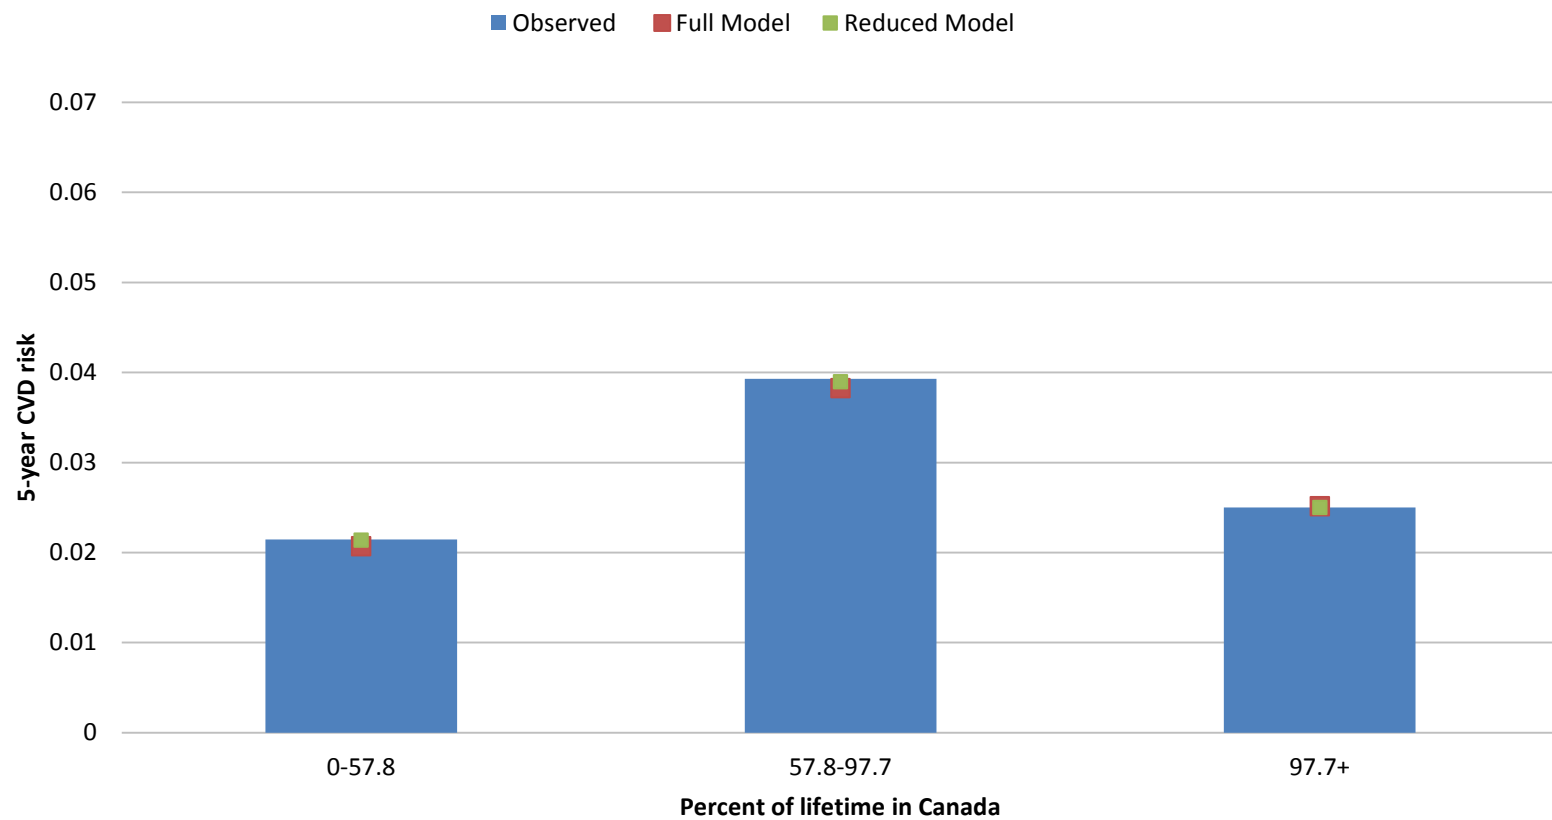

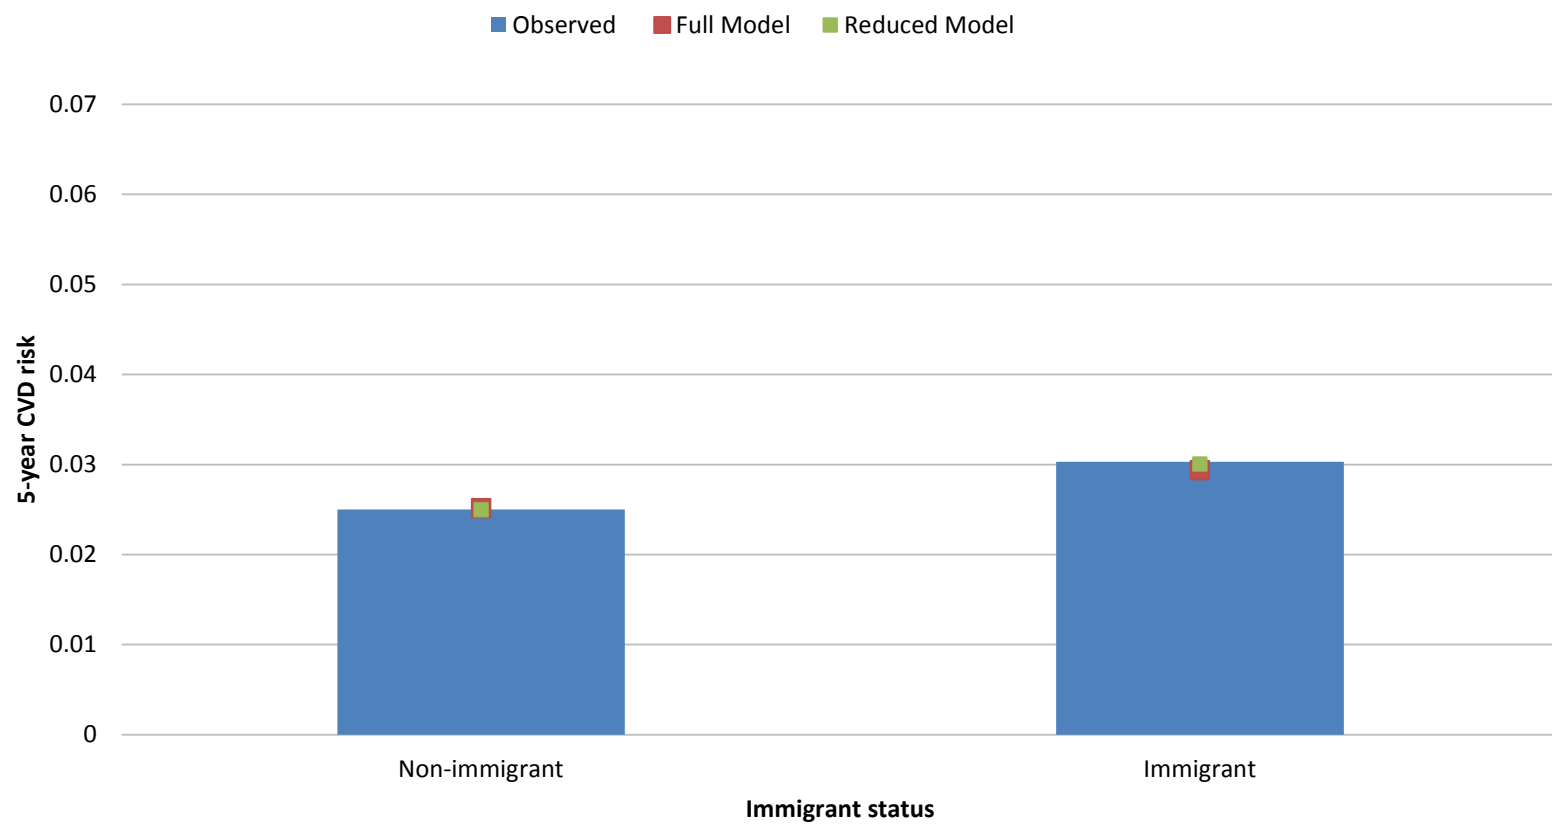

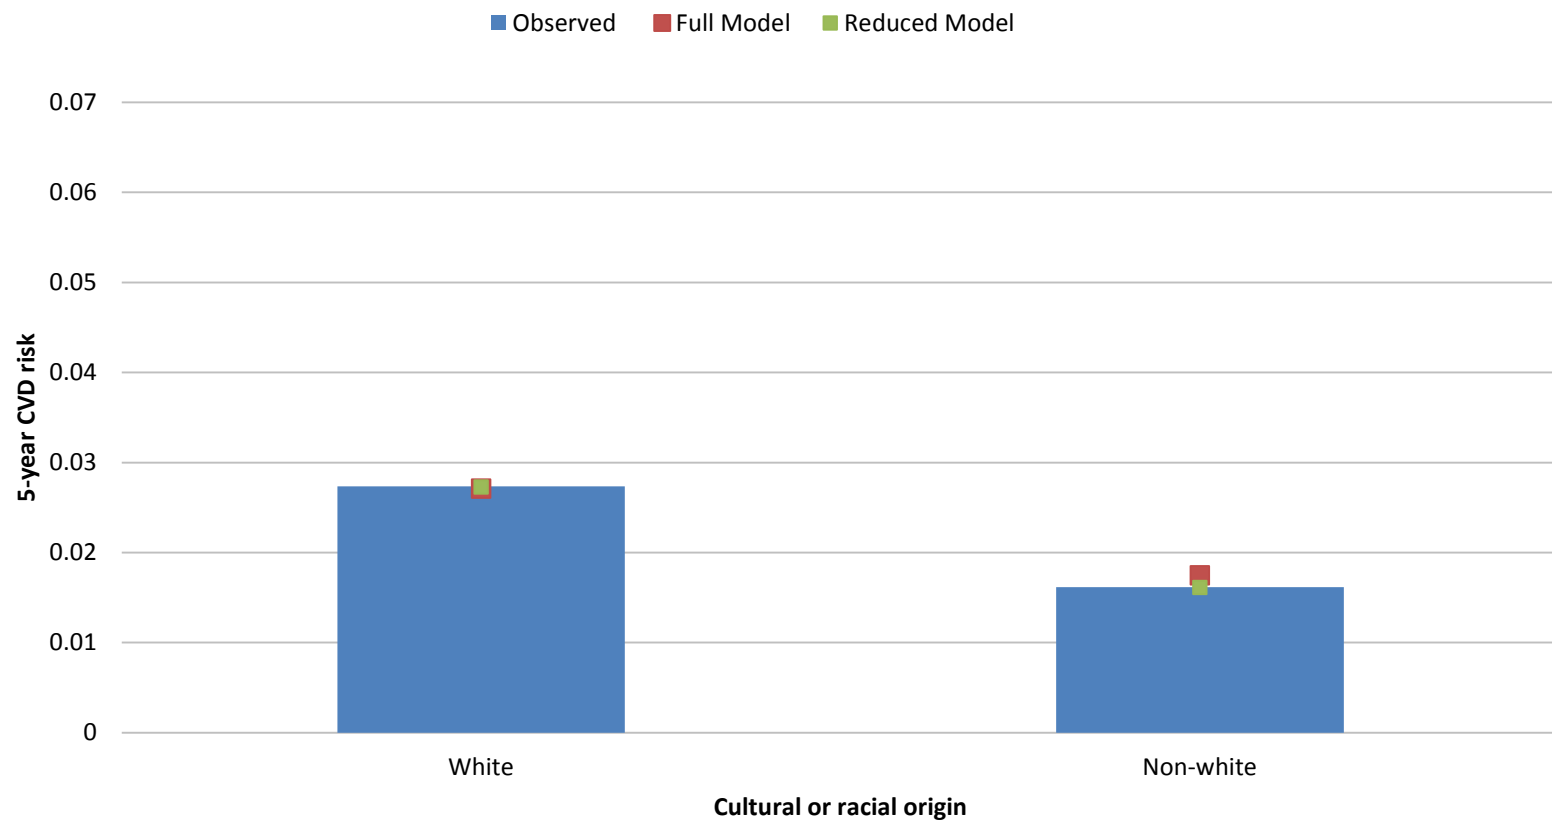

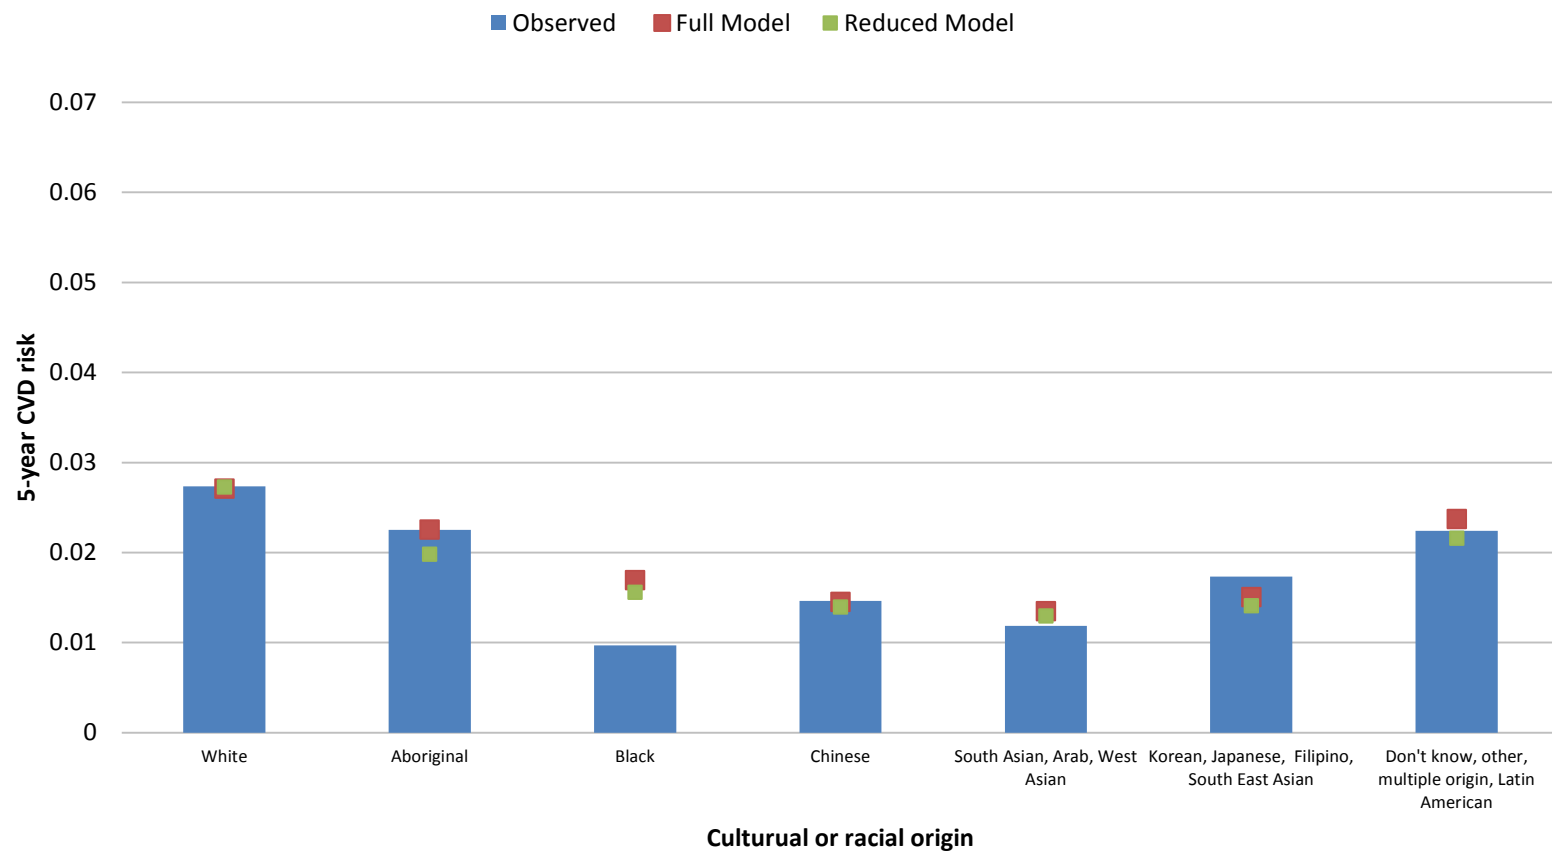

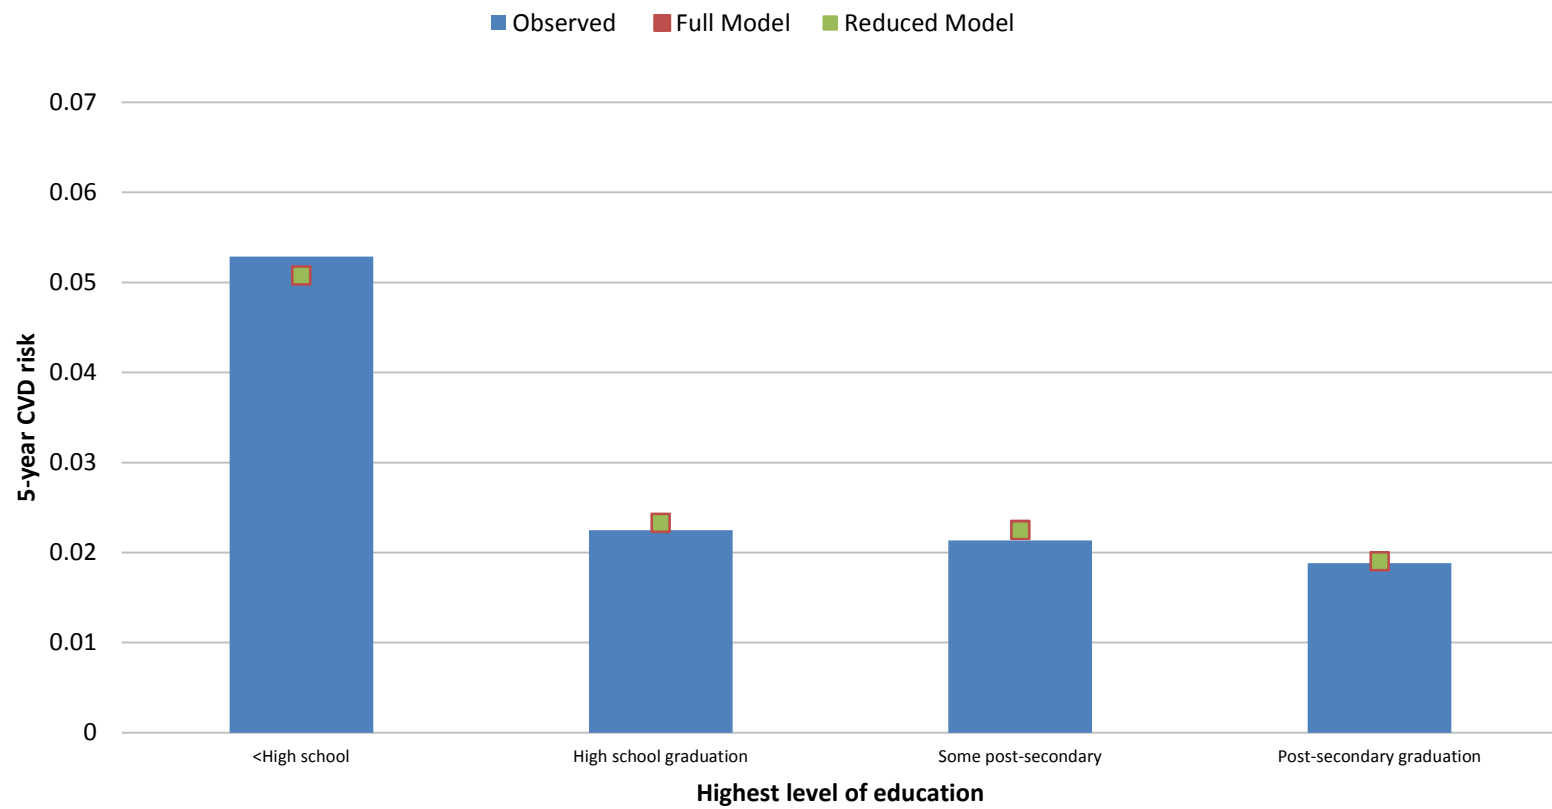



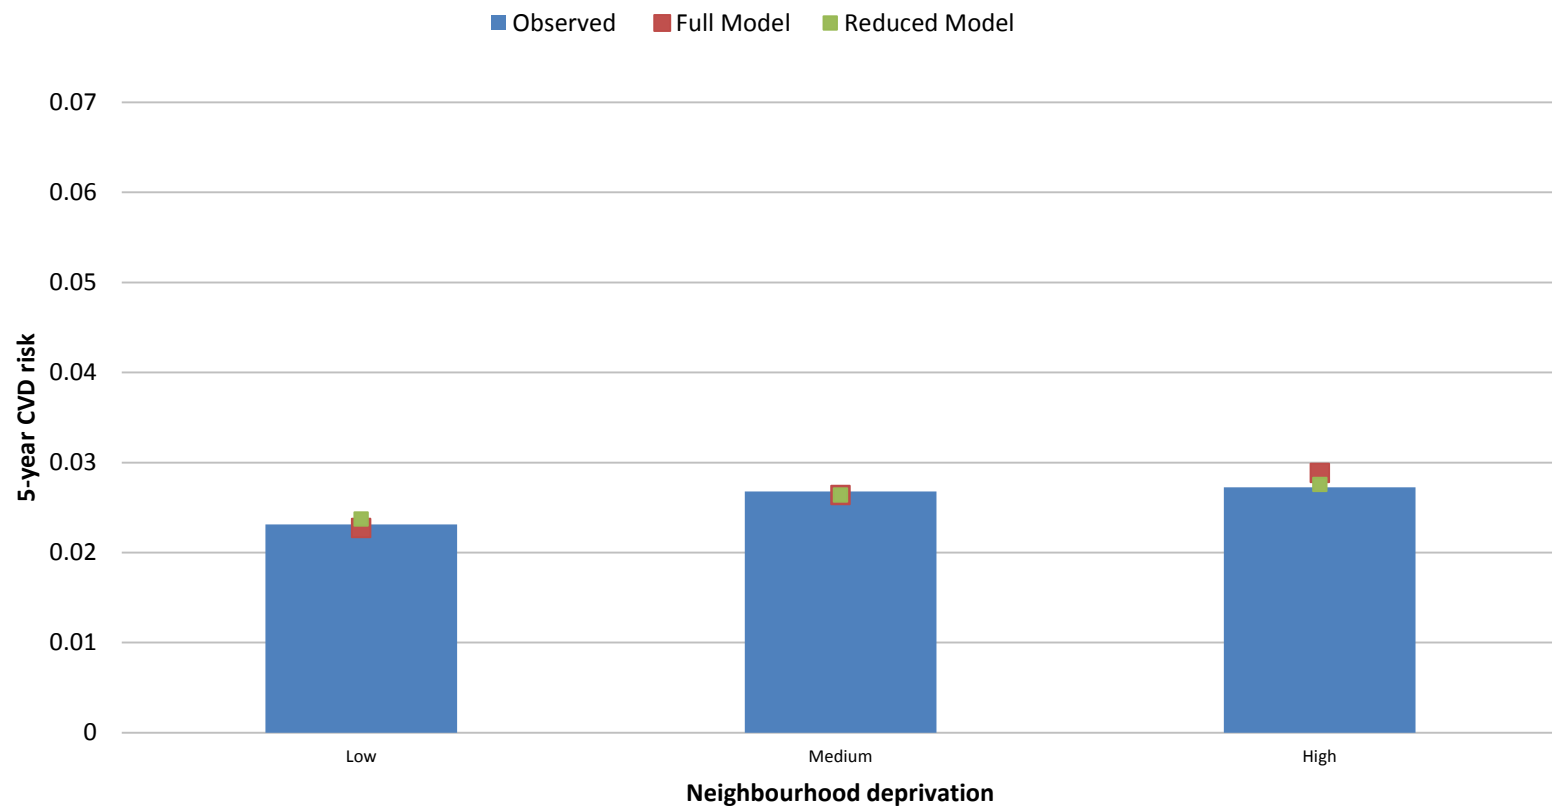

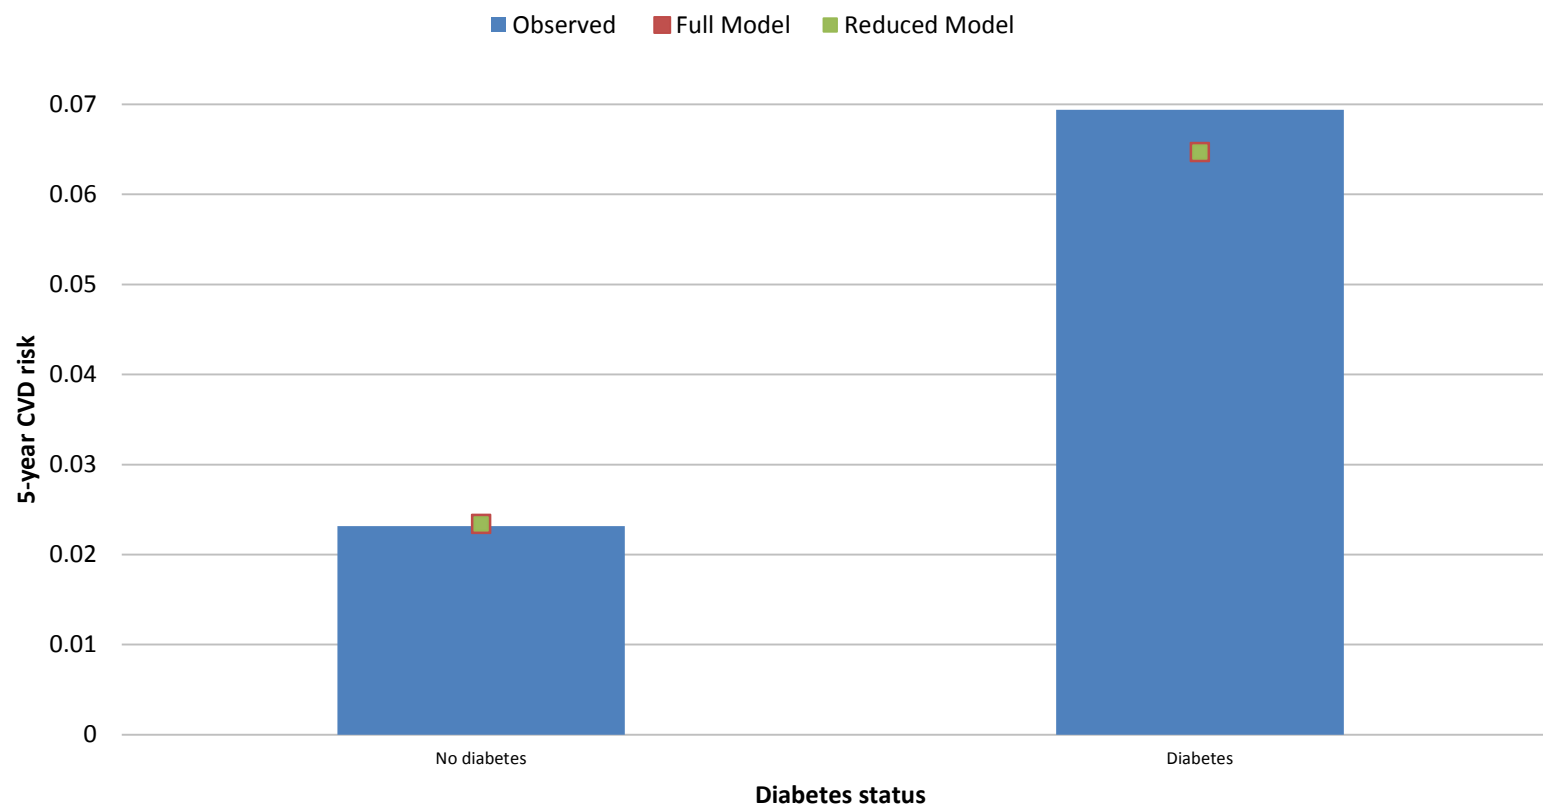

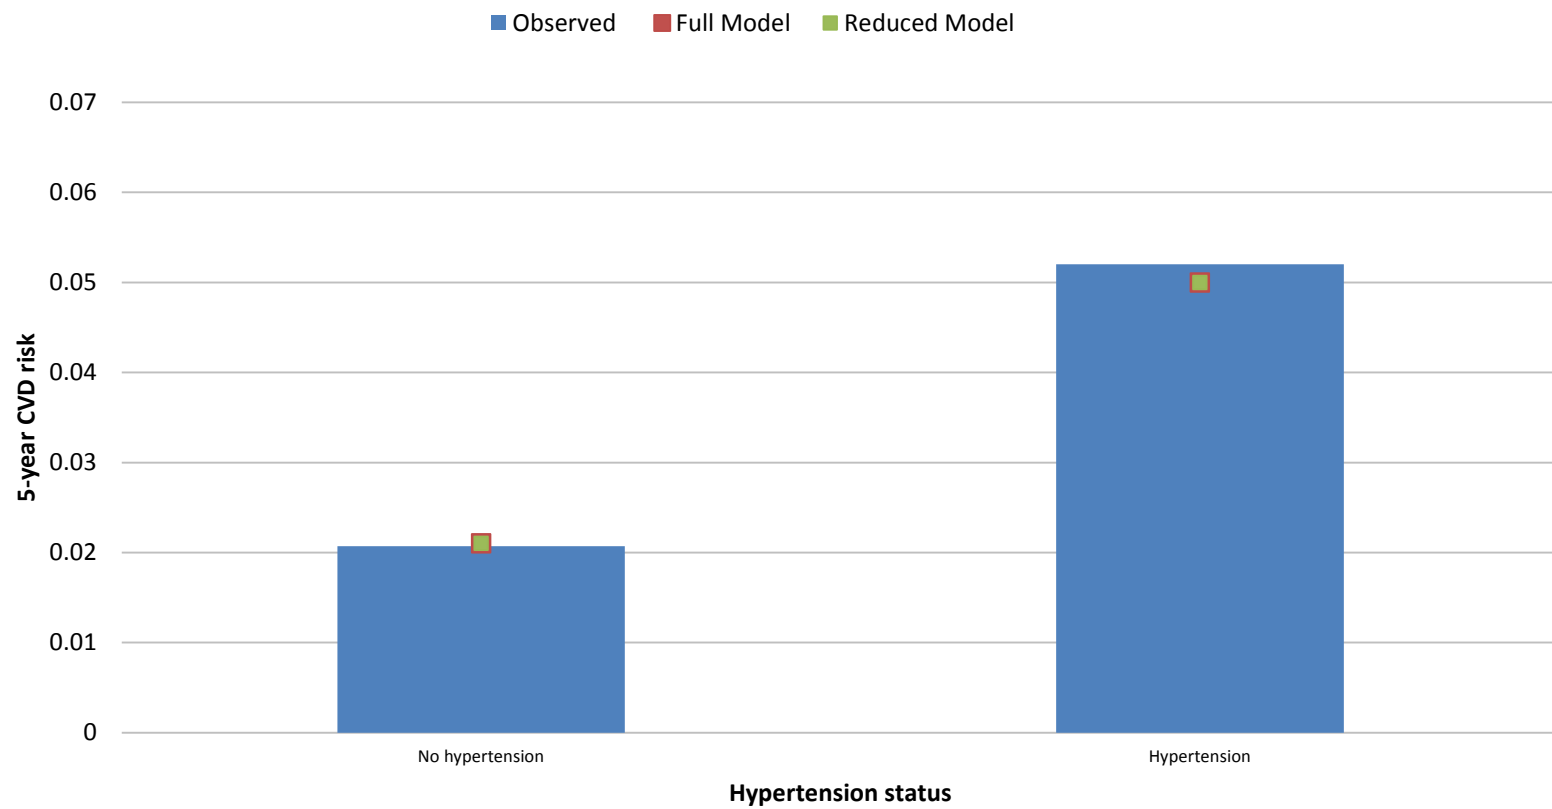

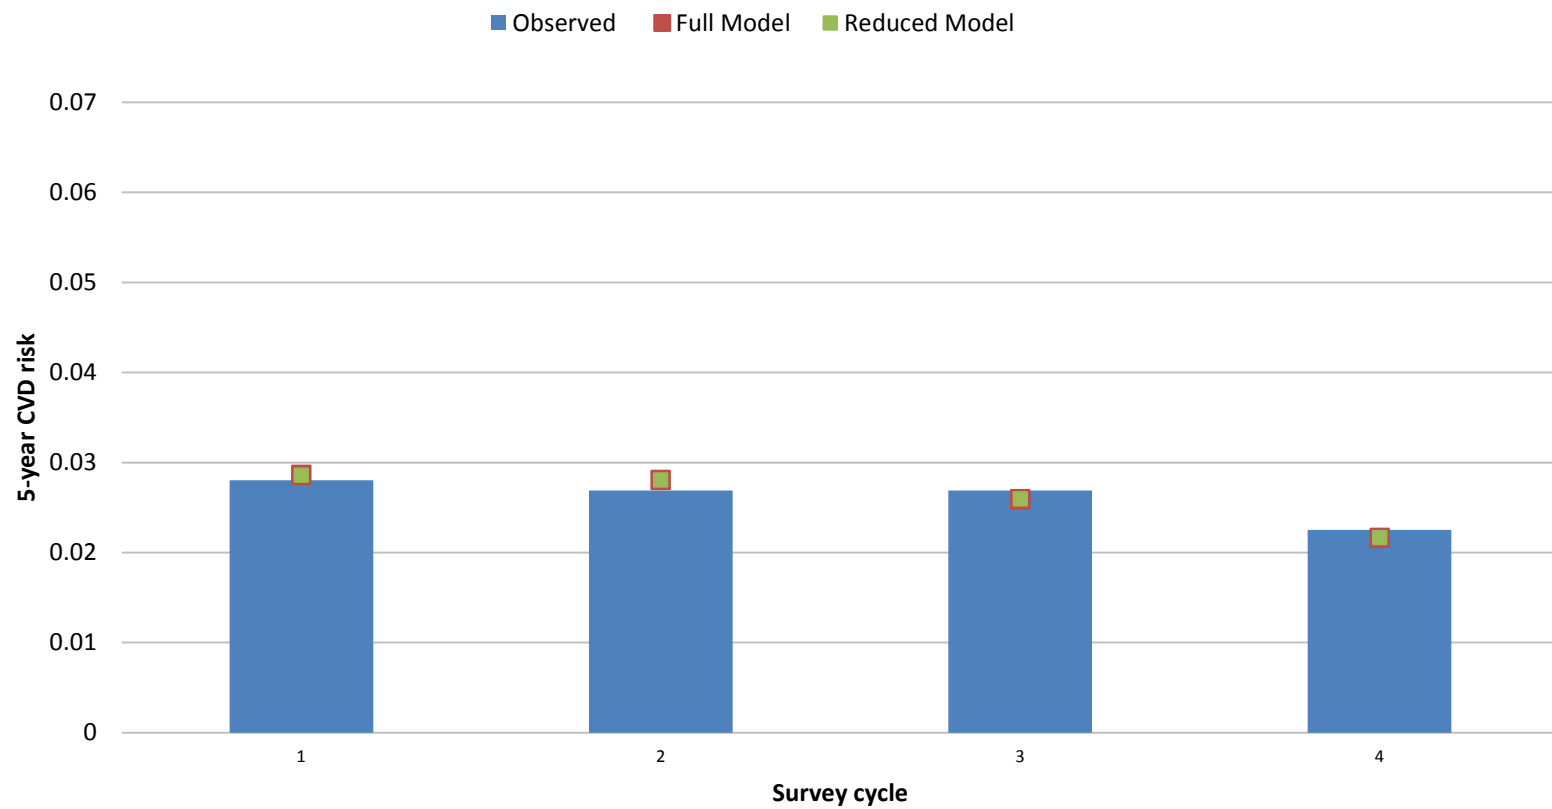

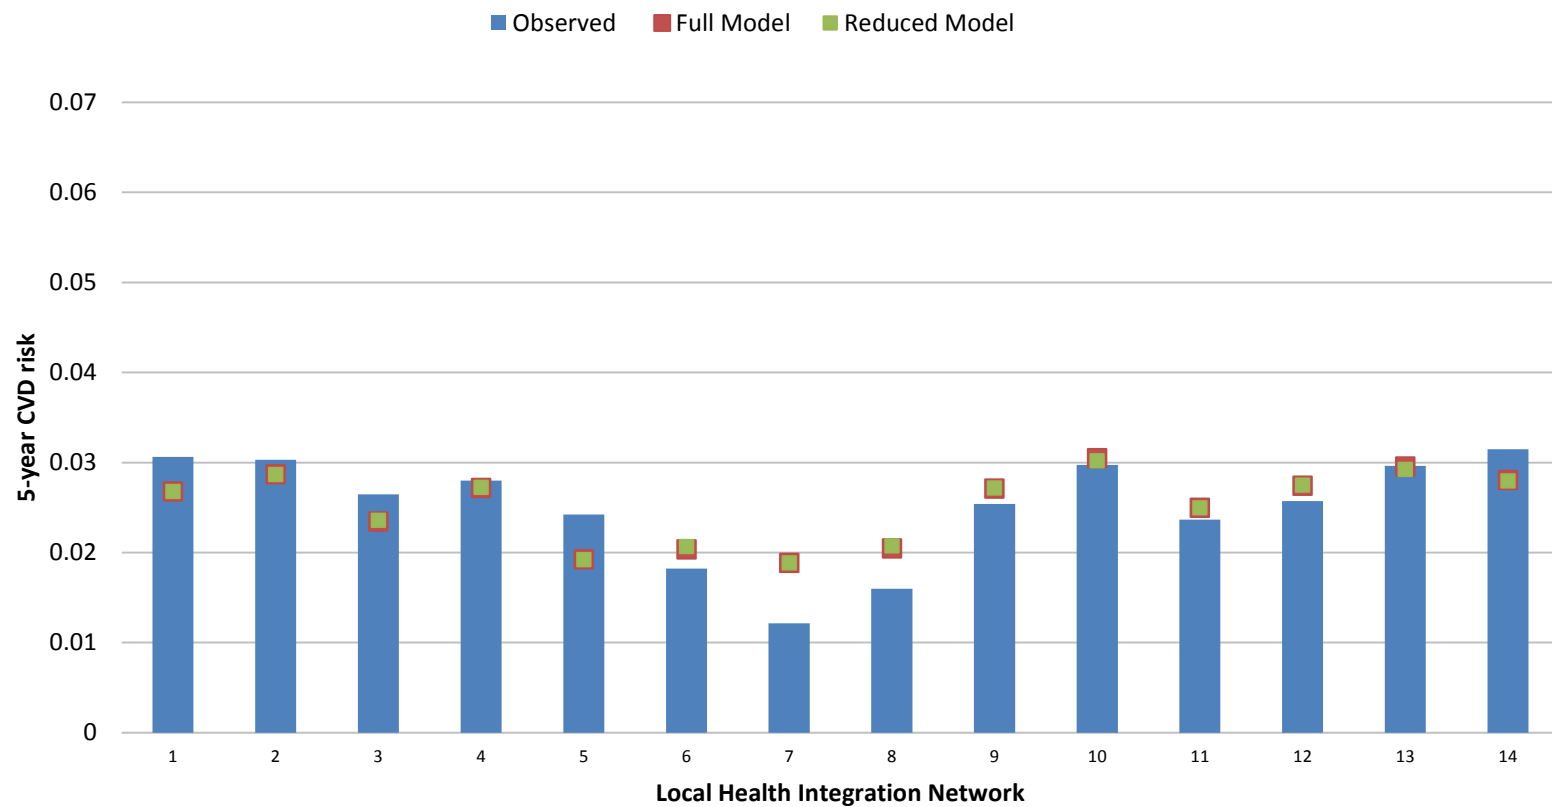

Supplement: 170914-res-7-at.pdf [file 170914-res-7-at.pdf]
